# Supplementary material for: Atmospheric chemistry of CH3O: its unimolecular reaction and reactions with H2O, NH3, and HF
Source: Royal Society of Chemistry journal article supplement (doi:10.1039/c7ra09167b), 2017-01-01
Supplement: c7ra09167b1.pdf [file c7ra09167b1.pdf]

## Electronic supplementary information

### Atmospheric chemistry of CH<sub>3</sub>O: its unimolecular reaction and reactions with H<sub>2</sub>O, NH<sub>3</sub>, and HF

Mei-Ling Wei<sup>a‡</sup> Xing-Feng Tan<sup>b‡</sup> Zheng-Wen Long<sup>a\*</sup> Bo Long<sup>a,bl</sup>

<sup>a</sup>Department of Physics, Guizhou University, Guiyang, 550025, China

<sup>b</sup>College of Material Science and Engineering, GuizhouMinzu University, Guiyang, 550025, China

**Table S1.** The energy barriers of the CH<sub>3</sub>O isomerization into CH<sub>2</sub>OH, the CH<sub>3</sub>O + H<sub>2</sub>O, the CH<sub>3</sub>O + NH<sub>3</sub>, and CH<sub>3</sub>O + HF reactions with zero-point energy involved for different theoretical methods at 0 K. (kcal/mol)

| Methods                     | TS1   | UE   | TS2   | UE   | TS3   | UE   | TS4   | UE   |
|-----------------------------|-------|------|-------|------|-------|------|-------|------|
| W3X-L//CCSD(T)-F12a/VDZ-F12 | 29.56 | 0.00 | 24.17 | 0.00 | 15.21 | 0.00 | 23.82 | 0.00 |
| W2X//CCSD(T)-F12a/VDZ-F12   | 29.64 | 0.08 | 24.26 | 0.09 | 15.26 | 0.05 | 24.30 | 0.48 |
| mPW2PLYP/maug-cc-pVTZ       | 31.03 | 1.47 | 23.77 | 0.40 | 15.39 | 0.18 | 22.33 | 1.49 |
| M06-2X/maug-cc-pVTZ         | 30.37 | 0.81 | 23.23 | 0.94 | 15.94 | 0.73 | 22.71 | 1.11 |
| B2PLYP/MG3S                 | 30.49 | 0.93 | 23.44 | 0.73 | 15.02 | 0.19 | 22.07 | 1.75 |
| M06-2X/aug-cc-pVTZ          | 30.24 | 0.68 | 22.88 | 1.29 | 15.78 | 0.57 | 22.37 | 1.45 |
| mPW2PLYP/ma-TZVP            | 31.44 | 1.88 | 23.57 | 0.60 | 15.37 | 0.16 | 22.35 | 1.47 |
| mPW2PLYP/aug-cc-pVTZ        | 30.83 | 1.27 | 23.39 | 0.78 | 15.04 | 0.17 | 21.91 | 1.91 |
| M06-2X/ma-TZVP              | 30.60 | 1.04 | 22.74 | 1.43 | 15.69 | 0.48 | 22.58 | 1.24 |
| B2PLYP/maug-cc-pVTZ         | 30.17 | 0.61 | 23.01 | 1.16 | 14.88 | 0.33 | 21.46 | 2.36 |
| M11-L/aug-cc-pVTZ           | 32.75 | 3.19 | 23.82 | 0.35 | 15.44 | 0.23 | 24.59 | 0.77 |
| G4                          | 30.09 | 0.53 | 25.87 | 1.70 | 15.97 | 0.76 | 25.55 | 1.73 |
| M11-L/ma-TZVP               | 33.30 | 3.74 | 23.62 | 0.55 | 15.21 | 0.00 | 24.36 | 0.54 |
| M11-L/MG3S                  | 33.11 | 3.55 | 23.89 | 0.28 | 15.09 | 0.12 | 24.9  | 1.08 |
| B2PLYP/ma-TZVP              | 30.58 | 1.02 | 22.78 | 1.39 | 14.84 | 0.37 | 21.47 | 2.35 |
| M11-L/maug-cc-pVTZ          | 32.95 | 3.39 | 24.13 | 0.04 | 15.96 | 0.75 | 24.83 | 1.01 |
| CBS-QB3                     | 29.74 | 0.18 | 25.24 | 1.07 | 15.06 | 0.15 | 27.62 | 3.80 |
| M05-2X/MG3S                 | 30.29 | 0.73 | 22.08 | 2.09 | 15.49 | 0.28 | 21.58 | 2.24 |
| B2PLYP/aug-cc-pVTZ          | 29.96 | 0.40 | 22.61 | 1.56 | 14.52 | 0.69 | 21.03 | 2.79 |
| B2PLYPD/MG3S                | 30.37 | 0.81 | 22.64 | 1.53 | 13.94 | 1.27 | 21.57 | 2.25 |
| B3LYP/MG3S                  | 31.48 | 1.92 | 24.09 | 0.08 | 16.06 | 0.85 | 20.69 | 3.13 |
| B3LYP/maug-cc-pVTZ          | 31.25 | 1.69 | 23.84 | 0.33 | 15.93 | 0.72 | 20.39 | 3.43 |
| B3LYP/aug-cc-pVTZ           | 31.12 | 1.56 | 23.78 | 0.39 | 15.83 | 0.62 | 20.21 | 3.61 |
| B98/MG3S                    | 31.25 | 1.69 | 23.01 | 1.16 | 14.90 | 0.31 | 20.77 | 3.05 |

<sup>l</sup>Corresponding author: [wwwlcommon@sina.com](mailto:wwwlcommon@sina.com) or [longbo@gzmu.edu.cn](mailto:longbo@gzmu.edu.cn) (Bo Long), [zwleng@gzu.edu.cn](mailto:zwleng@gzu.edu.cn) (Zheng-Wen Long)

<sup>‡</sup> Mei-Ling Wei and Xing-Feng Tan contributed equally.

|                       |       |      |       |       |       |      |       |       |
|-----------------------|-------|------|-------|-------|-------|------|-------|-------|
| BMK/aug-cc-pVTZ       | 31.95 | 2.39 | 25.93 | 1.76  | 17.32 | 2.11 | 23.42 | 0.40  |
| B2PLYPD/maug-cc-pVTZ  | 30.04 | 0.48 | 22.21 | 1.96  | 13.79 | 1.42 | 20.96 | 2.86  |
| BMK/maug-cc-pVTZ      | 32.10 | 2.54 | 26.08 | 1.91  | 17.27 | 2.06 | 23.58 | 0.24  |
| B98/maug-cc-pVTZ      | 30.92 | 1.36 | 22.64 | 1.53  | 14.72 | 0.49 | 20.44 | 3.38  |
| B3LYP/ma-TZVP         | 31.54 | 1.98 | 23.51 | 0.66  | 15.86 | 0.65 | 20.20 | 3.62  |
| B98/aug-cc-pVTZ       | 30.78 | 1.22 | 22.54 | 1.63  | 14.61 | 0.60 | 20.24 | 3.58  |
| MPW3LYP/MG3S          | 31.57 | 2.01 | 23.06 | 1.11  | 14.97 | 0.24 | 19.85 | 3.97  |
| B2PLYPD/ma-TZVP       | 30.46 | 0.90 | 21.98 | 2.19  | 13.74 | 1.47 | 20.97 | 2.85  |
| BMK/ma-TZVP           | 32.59 | 3.03 | 26.03 | 1.86  | 17.71 | 2.50 | 23.78 | 0.04  |
| B98/ma-TZVP           | 31.19 | 1.63 | 22.40 | 1.77  | 14.71 | 0.50 | 20.28 | 3.54  |
| B2PLYPD/aug-cc-pVTZ   | 29.84 | 0.28 | 21.82 | 2.35  | 13.42 | 1.79 | 20.53 | 3.29  |
| MPW3LYP/maug-cc-pVTZ  | 31.34 | 1.78 | 22.85 | 1.32  | 14.84 | 0.37 | 19.56 | 4.26  |
| MPW3LYP/aug-cc-pVTZ   | 31.21 | 1.65 | 22.78 | 1.39  | 14.75 | 0.46 | 19.37 | 4.45  |
| MPW3LYP/ma-TZVP       | 31.63 | 2.07 | 22.53 | 1.64  | 14.80 | 0.41 | 19.40 | 4.42  |
| BMK/MG3S              | 32.39 | 2.83 | 26.72 | 2.55  | 17.79 | 2.58 | 24.81 | 0.99  |
| HSEh1PBE/MG3S         | 30.63 | 1.07 | 21.57 | 2.60  | 13.51 | 1.70 | 19.53 | 4.29  |
| HSEh1PBE/maug-cc-pVTZ | 30.29 | 0.73 | 21.32 | 2.85  | 13.47 | 1.74 | 19.27 | 4.55  |
| HSEh1PBE/aug-cc-pVTZ  | 30.14 | 0.58 | 21.05 | 3.12  | 13.35 | 1.86 | 19.06 | 4.76  |
| HSEh1PBE/ma-TZVP      | 30.61 | 1.05 | 21.07 | 3.10  | 13.44 | 1.77 | 19.14 | 4.68  |
| MN12-SX/aug-cc-pVTZ   | 33.75 | 4.19 | 27.09 | 2.92  | 17.06 | 1.85 | 26.01 | 2.19  |
| M11/maug-cc-pVTZ      | 27.85 | 1.71 | 21.02 | 3.15  | 13.20 | 2.01 | 19.49 | 4.33  |
| M06-HF/MG3S           | 28.64 | 0.92 | 19.44 | 4.73  | 13.69 | 1.52 | 19.78 | 4.04  |
| M06-HF/maug-cc-pVTZ   | 28.05 | 1.51 | 19.42 | 4.75  | 13.81 | 1.40 | 19.76 | 4.06  |
| M06-HF/ma-TZVP        | 28.14 | 1.42 | 19.25 | 4.92  | 13.39 | 1.82 | 20.23 | 3.59  |
| MN12-SX/MG3S          | 33.95 | 4.39 | 27.35 | 3.18  | 17.10 | 1.89 | 26.44 | 2.62  |
| MN12-SX/maug-cc-pVTZ  | 33.92 | 4.36 | 27.41 | 3.24  | 17.40 | 2.19 | 26.25 | 2.43  |
| M11/aug-cc-pVTZ       | 27.72 | 1.84 | 20.71 | 3.46  | 12.81 | 2.40 | 19.09 | 4.73  |
| M11/MG3S              | 28.01 | 1.55 | 20.37 | 3.80  | 12.45 | 2.76 | 19.25 | 4.57  |
| M11/ma-TZVP           | 28.07 | 1.49 | 20.10 | 4.07  | 12.27 | 2.94 | 19.02 | 4.80  |
| MPW1K/aug-cc-pVTZ     | 33.11 | 3.55 | 27.52 | 3.35  | 18.93 | 3.72 | 26.79 | 2.97  |
| M06-HF/aug-cc-pVTZ    | 27.90 | 1.66 | 18.63 | 5.54  | 13.19 | 2.02 | 18.81 | 5.01  |
| MPW1K/maug-cc-pVTZ    | 33.27 | 3.71 | 27.70 | 3.53  | 19.12 | 3.91 | 27.05 | 3.23  |
| MPW1K/ma-TZVP         | 33.63 | 4.07 | 27.63 | 3.46  | 19.24 | 4.03 | 27.10 | 3.28  |
| MPW1K/MG3S            | 33.54 | 3.98 | 27.94 | 3.77  | 19.12 | 3.91 | 27.47 | 3.65  |
| BP86/MG3S             | 27.15 | 2.41 | 13.98 | 10.19 | 8.44  | 6.77 | 10.68 | 13.14 |
| BP86/maug-cc-pVTZ     | 26.85 | 2.71 | 13.73 | 10.44 | 8.34  | 6.87 | 10.40 | 13.42 |
| BP86/aug-cc-pVTZ      | 26.71 | 2.85 | 13.68 | 10.49 | 8.27  | 6.94 | 10.26 | 13.56 |
| BP86/ma-TZVP          | 27.15 | 2.41 | 13.29 | 10.88 | 8.17  | 7.04 | 10.21 | 13.61 |

**Table S2.** Cartesian coordinates (Å) of optimized structures.

| Species            | Methods              | Cartesian coordinates |               |               |               |
|--------------------|----------------------|-----------------------|---------------|---------------|---------------|
| CH <sub>3</sub> O  | CCSD(T)-F12a/VDZ-F12 | C                     | 0.5789757603  | 0.0000000512  | -0.0104858698 |
|                    |                      | H                     | 0.8668628834  | -0.0000250694 | 1.0545672683  |
|                    |                      | H                     | 1.0005408686  | 0.9055115383  | -0.4583370769 |
|                    |                      | H                     | 1.0005392839  | -0.9054918788 | -0.4583783219 |
|                    |                      | O                     | -0.7938267962 | 0.0000003588  | -0.0082589997 |
|                    | QCISD/cc-pVTZ        | C                     | -0.57989900   | 0.00000300    | -0.01128100   |
|                    |                      | H                     | -0.87522400   | -0.00017300   | 1.04965300    |
|                    |                      | H                     | -1.00227200   | -0.90294700   | -0.46197100   |
|                    |                      | H                     | -1.00228500   | 0.90308600    | -0.46169800   |
|                    |                      | O                     | 0.79489700    | 0.00000200    | -0.00728700   |
|                    | W1U                  | C                     | -0.57209800   | 0.00000100    | -0.01424900   |
|                    |                      | H                     | -0.87281200   | -0.00002700   | 1.05163900    |
|                    |                      | H                     | -1.00778800   | -0.90750900   | -0.45397500   |
|                    |                      | H                     | -1.00779000   | 0.90752900    | -0.45393400   |
|                    |                      | O                     | 0.79012200    | 0.00000000    | -0.00727900   |
|                    | W1BD                 | C                     | -0.57209800   | 0.00000100    | -0.01424900   |
|                    |                      | H                     | -0.87281200   | -0.00002700   | 1.05163900    |
|                    |                      | H                     | -1.00778800   | -0.90750900   | -0.45397500   |
|                    |                      | H                     | -1.00779000   | 0.90752900    | -0.45393400   |
|                    |                      | O                     | 0.79012200    | 0.00000000    | -0.00727900   |
|                    | mPW2PLYP/MG3S        | C                     | 0.57569500    | 0.00000000    | -0.01244000   |
|                    |                      | H                     | 0.86680800    | -0.00001200   | 1.04926700    |
|                    |                      | H                     | 0.99902100    | 0.90334500    | -0.45736100   |
|                    |                      | H                     | 0.99902000    | -0.90333500   | -0.45738000   |
|                    |                      | O                     | -0.78987700   | 0.00000000    | -0.00748600   |
|                    | M06-2X/MG3S          | C                     | -0.57558700   | 0.00001100    | -0.01242200   |
|                    |                      | H                     | -0.87025900   | -0.00047600   | 1.05021600    |
|                    |                      | H                     | -0.99764900   | -0.90507400   | -0.45959400   |
|                    |                      | H                     | -0.99765200   | 0.90546300    | -0.45884400   |
|                    |                      | O                     | 0.78988500    | 0.00000200    | -0.00715600   |
|                    | G4                   | C                     | 0.57118600    | 0.00001000    | -0.01363300   |
|                    |                      | H                     | 0.87219100    | -0.00036200   | 1.05565400    |
|                    |                      | H                     | 1.01386300    | 0.90879200    | -0.45525000   |
|                    |                      | H                     | 1.01383400    | -0.90851800   | -0.45581000   |
|                    |                      | O                     | -0.79087500   | 0.00000400    | -0.00785000   |
|                    | CBS-QB3              | C                     | 0.57287600    | 0.00000700    | -0.01416300   |
| H                  |                      | 0.87157100            | -0.00024200   | 1.05450300    |               |
| H                  |                      | 1.01190900            | 0.90937700    | -0.45389600   |               |
| H                  |                      | 1.01187900            | -0.90920200   | -0.45426600   |               |
| O                  |                      | -0.79157700           | 0.00000300    | -0.00767000   |               |
| M05-2X/aug-cc-pVTZ | C                    | -0.57972900           | 0.00002000    | -0.01162600   |               |
|                    | H                    | -0.86661400           | -0.00081000   | 1.04965700    |               |
|                    | H                    | -0.99467000           | -0.90330100   | -0.46105600   |               |

|                  |                      |   |               |               |               |
|------------------|----------------------|---|---------------|---------------|---------------|
|                  |                      | H | -0.99472600   | 0.90393300    | -0.45979100   |
|                  |                      | O | 0.79179800    | 0.00000700    | -0.00738200   |
|                  | M05-2X/maug-cc-pVTZ  | C | -0.57959500   | 0.00001900    | -0.01164200   |
|                  |                      | H | -0.86730100   | -0.00079000   | 1.04946700    |
|                  |                      | H | -0.99458400   | -0.90327800   | -0.46114200   |
|                  |                      | H | -0.99463800   | 0.90389500    | -0.45990800   |
|                  |                      | O | 0.79176200    | 0.00000700    | -0.00732100   |
|                  | CCSD(T)-F12a/VDZ-F12 | O | 0.000000000   | 0.000000000   | 0.1210648408  |
|                  |                      | H | 0.000000000   | 0.7573423197  | -0.4668634204 |
|                  |                      | H | 0.000000000   | -0.7573423197 | -0.4668634204 |
|                  | QCISD/cc-pVTZ        | O | 0.00000000    | 0.00000000    | 0.11806100    |
|                  |                      | H | 0.00000000    | 0.75365100    | -0.47224500   |
|                  |                      | H | 0.00000000    | -0.75365100   | -0.47224500   |
|                  | W1U                  | O | 0.00000000    | 0.00000000    | 0.11767500    |
|                  |                      | H | 0.00000000    | 0.76026200    | -0.47070100   |
|                  |                      | H | 0.00000000    | -0.76026200   | -0.47070100   |
|                  | W1BD                 | O | 0.00000000    | 0.00000000    | 0.11767500    |
|                  |                      | H | 0.00000000    | 0.76026200    | -0.47070100   |
|                  |                      | H | 0.00000000    | -0.76026200   | -0.47070100   |
|                  | mPW2PLYP/MG3S        | O | 0.00000000    | 0.00000000    | 0.11647500    |
|                  |                      | H | 0.00000000    | 0.75974800    | -0.46589900   |
|                  |                      | H | 0.00000000    | -0.75974800   | -0.46589900   |
|                  | M06-2X/MG3S          | O | 0.00000000    | 0.00000000    | 0.11633200    |
|                  |                      | H | 0.00000000    | 0.76137700    | -0.46532900   |
|                  |                      | H | 0.00000000    | -0.76137700   | -0.46532900   |
|                  | G4                   | O | 0.00000000    | 0.00000000    | 0.11767500    |
|                  |                      | H | 0.00000000    | 0.76026200    | -0.47070100   |
|                  |                      | H | 0.00000000    | -0.76026200   | -0.47070100   |
|                  | CBS-QB3              | O | 0.00000000    | 0.00000000    | 0.11869700    |
|                  |                      | H | 0.00000000    | 0.75707300    | -0.47478600   |
|                  |                      | H | 0.00000000    | -0.75707300   | -0.47478600   |
|                  | M05-2X/aug-cc-pVTZ   | O | 0.00000000    | 0.00000000    | 0.11571800    |
|                  |                      | H | 0.00000000    | 0.76311300    | -0.46287200   |
|                  |                      | H | 0.00000000    | -0.76311300   | -0.46287200   |
|                  | M05-2X/maug-cc-pVTZ  | O | 0.00000000    | 0.00000000    | 0.11583200    |
|                  |                      | H | 0.00000000    | 0.76267500    | -0.46332900   |
|                  |                      | H | 0.00000000    | -0.76267500   | -0.46332900   |
|                  | CCSD(T)-F12a/VDZ-F12 | N | 0.000000000   | -0.0000134653 | 0.1266037763  |
|                  |                      | H | 0.000000000   | 0.9370892003  | -0.2563940685 |
|                  |                      | H | -0.8115236102 | -0.4685378675 | -0.2563893539 |
|                  |                      | H | 0.8115236102  | -0.4685378675 | -0.2563893539 |
|                  | QCISD/cc-pVTZ        | N | 0.00000000    | 0.00000000    | 0.11773900    |
|                  |                      | H | 0.00000000    | 0.93281400    | -0.27472400   |
|                  |                      | H | -0.80784000   | -0.46640700   | -0.27472400   |
| H <sub>2</sub> O |                      |   |               |               |               |
| NH <sub>3</sub>  |                      |   |               |               |               |

|    |                      |   |              |              |               |
|----|----------------------|---|--------------|--------------|---------------|
|    |                      | H | 0.80784000   | -0.46640700  | -0.27472400   |
|    | W1U                  | N | 0.00000000   | 0.00000000   | 0.11542400    |
|    |                      | H | 0.00000000   | 0.93792800   | -0.26932200   |
|    |                      | H | -0.81227000  | -0.46896400  | -0.26932200   |
|    |                      | H | 0.81227000   | -0.46896400  | -0.26932200   |
|    | W1BD                 | N | 0.00000000   | 0.00000000   | 0.11542300    |
|    |                      | H | 0.00000000   | 0.93792900   | -0.26932100   |
|    |                      | H | -0.81227100  | -0.46896500  | -0.26932100   |
|    |                      | H | 0.81227100   | -0.46896500  | -0.26932100   |
|    | mPW2PLYP/MG3S        | N | 0.00000000   | 0.00000000   | 0.11006500    |
|    |                      | H | 0.00000000   | 0.94025400   | -0.25681900   |
|    |                      | H | -0.81428400  | -0.47012700  | -0.25681900   |
|    |                      | H | 0.81428400   | -0.47012700  | -0.25681900   |
|    | M06-2X/MG3S          | N | 0.00000000   | 0.00000000   | 0.11154600    |
|    |                      | H | 0.00000000   | 0.94100500   | -0.26027400   |
|    |                      | H | -0.81493400  | -0.47050200  | -0.26027400   |
|    |                      | H | 0.81493400   | -0.47050200  | -0.26027400   |
|    | G4                   | N | 0.00000000   | 0.00000000   | 0.12058500    |
|    |                      | H | 0.00000000   | 0.93425700   | -0.28136600   |
|    |                      | H | -0.80909000  | -0.46712800  | -0.28136600   |
|    |                      | H | 0.80909000   | -0.46712800  | -0.28136600   |
|    | CBS-QB3              | N | 0.00000000   | 0.00000000   | 0.11608700    |
|    |                      | H | 0.00000000   | 0.93921700   | -0.27087000   |
|    |                      | H | -0.81338600  | -0.46960900  | -0.27087000   |
|    |                      | H | 0.81338600   | -0.46960900  | -0.27087000   |
|    | M05-2X/aug-cc-pVTZ   | N | 0.00000000   | 0.00000000   | 0.10931700    |
|    |                      | H | 0.00000000   | 0.94015600   | -0.25507300   |
|    |                      | H | -0.81419900  | -0.47007800  | -0.25507300   |
|    |                      | H | 0.81419900   | -0.47007800  | -0.25507300   |
|    | M05-2X/maug-cc-pVTZ  | N | 0.00000000   | 0.00000000   | 0.10861700    |
|    |                      | H | 0.00000000   | 0.94090600   | -0.25343900   |
|    |                      | H | -0.81484800  | -0.47045300  | -0.25343900   |
|    |                      | H | 0.81484800   | -0.47045300  | -0.25343900   |
| HF | CCSD(T)-F12a/VDZ-F12 | F | 0.0000000000 | 0.0000000000 | 0.0903331523  |
|    |                      | H | 0.0000000000 | 0.0000000000 | -0.8276841523 |
|    | QCISD/cc-pVTZ        | F | 0.00000000   | 0.00000000   | 0.09157200    |
|    |                      | H | 0.00000000   | 0.00000000   | -0.82414400   |
|    | W1U                  | F | 0.00000000   | 0.00000000   | 0.09223100    |
|    |                      | H | 0.00000000   | 0.00000000   | -0.83008200   |
|    | W1BD                 | F | 0.00000000   | 0.00000000   | 0.09223100    |
|    |                      | H | 0.00000000   | 0.00000000   | -0.83008200   |
|    | mPW2PLYP/MG3S        | F | 0.00000000   | 0.00000000   | 0.09177200    |
|    |                      | H | 0.00000000   | 0.00000000   | -0.82594600   |
|    | M06-2X/MG3S          | F | 0.00000000   | 0.00000000   | 0.09177400    |

|     |                      |             |               |               |               |
|-----|----------------------|-------------|---------------|---------------|---------------|
|     |                      | H           | 0.00000000    | 0.00000000    | -0.82596600   |
|     | G4                   | F           | 0.00000000    | 0.00000000    | 0.09195900    |
|     |                      | H           | 0.00000000    | 0.00000000    | -0.82762800   |
|     | CBS-QB3              | F           | 0.00000000    | 0.00000000    | 0.09201700    |
|     |                      | H           | 0.00000000    | 0.00000000    | -0.82815200   |
|     | M05-2X/aug-cc-pVTZ   | F           | 0.00000000    | 0.00000000    | 0.09213100    |
|     |                      | H           | 0.00000000    | 0.00000000    | -0.82917800   |
|     | M05-2X/maug-cc-pVTZ  | F           | 0.00000000    | 0.00000000    | 0.09210500    |
|     |                      | H           | 0.00000000    | 0.00000000    | -0.82894400   |
| TS1 | CCSD(T)-F12a/VDZ-F12 | C           | -0.6321910990 | -0.0001587060 | 0.0141199447  |
|     |                      | H           | 0.1774326049  | -0.0000810669 | 0.9794489665  |
|     |                      | H           | -1.1529995157 | -0.9363049088 | -0.1691491640 |
|     |                      | H           | -1.1526770924 | 0.9364448129  | -0.1676456763 |
|     |                      | O           | 0.7459211022  | -0.0002611313 | -0.0966800709 |
|     | QCISD/cc-pVTZ        | C           | -0.63499900   | 0.00003500    | 0.01410300    |
|     |                      | H           | 0.17365800    | -0.00313800   | 0.97742900    |
|     |                      | H           | -1.15598500   | -0.93311000   | -0.17914000   |
|     |                      | H           | -1.15604700   | 0.93386900    | -0.17550700   |
|     |                      | O           | 0.74354600    | 0.00027100    | -0.08842500   |
|     | W1U                  | C           | -0.03388600   | 0.63511400    | 0.00000000    |
|     |                      | H           | -0.25700500   | 1.14542500    | 0.93516100    |
|     |                      | H           | -0.25700500   | 1.14542500    | -0.93516100   |
|     |                      | H           | 0.98840900    | -0.11654800   | 0.00000000    |
|     |                      | O           | -0.03388600   | -0.74812300   | 0.00000000    |
|     | W1BD                 | C           | -0.03388600   | 0.63511400    | 0.00000000    |
|     |                      | H           | -0.25700500   | 1.14542500    | 0.93516100    |
|     |                      | H           | -0.25700500   | 1.14542500    | -0.93516100   |
|     |                      | H           | 0.98840900    | -0.11654800   | 0.00000000    |
|     |                      | O           | -0.03388600   | -0.74812300   | 0.00000000    |
|     | mPW2PLYP/MG3S        | C           | -0.63347200   | 0.00000000    | 0.01191500    |
|     |                      | H           | 0.17800300    | 0.00000000    | 0.97617400    |
|     |                      | H           | -1.15330000   | -0.93322500   | -0.17103100   |
|     |                      | H           | -1.15330000   | 0.93322500    | -0.17103100   |
|     |                      | O           | 0.74117900    | 0.00000000    | -0.08820000   |
|     | M06-2X/MG3S          | C           | -0.62926800   | 0.00000000    | 0.01080100    |
|     |                      | H           | -1.15094100   | -0.93574700   | -0.16955900   |
|     |                      | H           | -1.15094100   | 0.93574800    | -0.16955500   |
| H   |                      | 0.17492700  | -0.00000300   | 0.98048100    |               |
| O   |                      | 0.73782100  | 0.00000000    | -0.08827200   |               |
| G4  | C                    | -0.03293200 | 0.63451100    | 0.00000000    |               |
|     | H                    | -0.26188500 | 1.14985100    | 0.93651300    |               |
|     | H                    | -0.26188500 | 1.14985100    | -0.93651300   |               |
|     | H                    | 0.98481900  | -0.11627300   | 0.00000000    |               |
|     | O                    | -0.03293200 | -0.74881200   | 0.00000000    |               |

|      |                      |             |               |               |               |
|------|----------------------|-------------|---------------|---------------|---------------|
|      | CBS-QB3              | C           | -0.03357300   | 0.63679400    | 0.00000000    |
|      |                      | H           | -0.25818700   | 1.14780700    | 0.93731000    |
|      |                      | H           | -0.25818700   | 1.14780700    | -0.93731000   |
|      |                      | H           | 0.98639300    | -0.11599300   | 0.00000000    |
|      |                      | O           | -0.03357300   | -0.75004800   | 0.00000000    |
|      | M05-2X/aug-cc-pVTZ   | C           | -0.63140800   | 0.00003800    | 0.00987000    |
|      |                      | H           | 0.17019600    | -0.00258100   | 0.98242800    |
|      |                      | H           | -1.14926000   | -0.93349600   | -0.17105400   |
|      |                      | H           | -1.14947600   | 0.93400100    | -0.16807600   |
|      |                      | O           | 0.73962400    | 0.00023100    | -0.08781500   |
|      | M05-2X/maug-cc-pVTZ  | C           | -0.63163300   | 0.00000000    | 0.01032400    |
|      |                      | H           | -1.14914500   | -0.93384300   | -0.17042200   |
|      |                      | H           | -1.14914500   | 0.93384400    | -0.17041900   |
|      |                      | H           | 0.17050000    | -0.00000300   | 0.98181300    |
|      |                      | O           | 0.73969900    | 0.00000000    | -0.08786500   |
| TS2  | CCSD(T)-F12a/VDZ-F12 | C           | -1.0071997687 | -0.5164627632 | 0.0193782838  |
|      |                      | H           | 0.4632796708  | -0.7892170962 | 0.1503856359  |
|      |                      | H           | -1.0923990655 | -1.0590293708 | -0.9339082711 |
|      |                      | H           | -1.6304576097 | -0.9005661880 | 0.8309251950  |
|      |                      | O           | -0.7459282413 | 0.7687712235  | -0.0140650128 |
|      |                      | O           | 1.4497341806  | -0.1184515434 | -0.0872667109 |
|      |                      | H           | 0.6869656797  | 0.6251443639  | -0.1822208154 |
|      |                      | H           | 1.9117221542  | 0.0422363740  | 0.7439576955  |
|      | QCISD/cc-pVTZ        | C           | -1.00194800   | -0.51726100   | 0.01915900    |
|      |                      | H           | 0.46777500    | -0.78558200   | 0.12062500    |
|      |                      | H           | -1.13129000   | -1.05126700   | -0.93288500   |
|      |                      | H           | -1.58787000   | -0.91773500   | 0.85053000    |
|      |                      | O           | -0.74259000   | 0.76519500    | -0.00652100   |
|      |                      | O           | 1.45272900    | -0.11437300   | -0.08627400   |
|      |                      | H           | 0.69343200    | 0.62267600    | -0.17174200   |
| H    |                      | 1.88853000  | 0.02889800    | 0.76087700    |               |
| W1U  | C                    | -0.99779100 | -0.52527900   | -0.00367800   |               |
|      | H                    | 0.45548300  | -0.78925300   | -0.23433500   |               |
|      | H                    | -1.68889100 | -0.89509600   | -0.76583500   |               |
|      | H                    | -1.02040800 | -1.09001200   | 0.94328600    |               |
|      | O                    | -0.74193300 | 0.76071300    | 0.03470200    |               |
|      | O                    | 1.45169300  | -0.06583300   | -0.12318000   |               |
|      | H                    | 1.92773200  | -0.28029100   | 0.68907800    |               |
|      | H                    | 0.63475500  | 0.64728900    | 0.09770000    |               |
| W1BD | C                    | -0.99779100 | -0.52527900   | -0.00367800   |               |
|      | H                    | 0.45548300  | -0.78925300   | -0.23433500   |               |
|      | H                    | -1.68889100 | -0.89509600   | -0.76583500   |               |
|      | H                    | -1.02040800 | -1.09001200   | 0.94328600    |               |
|      | O                    | -0.74193300 | 0.76071300    | 0.03470200    |               |

|  |                     |   |             |             |             |
|--|---------------------|---|-------------|-------------|-------------|
|  |                     | O | 1.45169300  | -0.06583300 | -0.12318000 |
|  |                     | H | 1.92773200  | -0.28029100 | 0.68907800  |
|  |                     | H | 0.63475500  | 0.64728900  | 0.09770000  |
|  | mPW2PLYP/MG3S       | C | -1.00375000 | -0.52216800 | 0.00121300  |
|  |                     | H | 0.48004700  | -0.78856400 | -0.17960900 |
|  |                     | H | -1.60515500 | -0.91606400 | -0.81842700 |
|  |                     | H | -1.10897500 | -1.05915300 | 0.95219500  |
|  |                     | O | -0.74588800 | 0.75961700  | 0.02910900  |
|  |                     | O | 1.45098700  | -0.07443100 | -0.11890300 |
|  |                     | H | 1.93446600  | -0.23737500 | 0.69743900  |
|  |                     | H | 0.68132200  | 0.65268000  | 0.05947100  |
|  | M06-2X/MG3S         | C | -1.00059700 | -0.52033300 | -0.00059300 |
|  |                     | H | 0.45322300  | -0.78478800 | -0.20645500 |
|  |                     | H | -1.65109800 | -0.90254900 | -0.78965800 |
|  |                     | H | -1.05047300 | -1.06895700 | 0.95186900  |
|  |                     | O | -0.74383600 | 0.75645200  | 0.03212900  |
|  |                     | O | 1.44729300  | -0.07100600 | -0.12104400 |
|  |                     | H | 1.94844100  | -0.25499700 | 0.68030200  |
|  |                     | H | 0.67583900  | 0.64971700  | 0.07882300  |
|  | G4                  | C | -0.98658300 | -0.52726500 | -0.00723300 |
|  |                     | H | 0.43218100  | -0.78269900 | -0.26242100 |
|  |                     | H | -1.71878800 | -0.88770200 | -0.74025800 |
|  |                     | H | -0.98502200 | -1.10183200 | 0.94004400  |
|  |                     | O | -0.73641100 | 0.76161400  | 0.03712000  |
|  |                     | O | 1.44657300  | -0.06174000 | -0.12466000 |
|  |                     | H | 1.90358000  | -0.30586200 | 0.69117300  |
|  |                     | H | 0.60624800  | 0.64270100  | 0.11518300  |
|  | CBS-QB3             | C | -0.99008200 | -0.52881400 | -0.00655400 |
|  |                     | H | 0.44845900  | -0.78389000 | -0.26760000 |
|  |                     | H | -1.72482600 | -0.88670800 | -0.73582100 |
|  |                     | H | -0.97898600 | -1.10053500 | 0.94042700  |
|  |                     | O | -0.73933700 | 0.76172700  | 0.03706900  |
|  |                     | O | 1.44671100  | -0.06229000 | -0.12368200 |
|  |                     | H | 1.91527900  | -0.29915200 | 0.68716100  |
|  |                     | H | 0.62157700  | 0.64767300  | 0.10806600  |
|  | M05-2X/aug-cc-pVTZ  | C | -1.00396100 | -0.51496400 | 0.01915100  |
|  |                     | H | 0.42148800  | -0.80343200 | 0.14937100  |
|  |                     | H | -1.09626500 | -1.04587800 | -0.93472600 |
|  |                     | H | -1.61238400 | -0.90163600 | 0.83474900  |
|  |                     | O | -0.73717700 | 0.76315500  | -0.00705300 |
|  |                     | O | 1.45007900  | -0.11505200 | -0.08425500 |
|  |                     | H | 0.66199700  | 0.62677400  | -0.16191300 |
|  |                     | H | 1.94571900  | 0.02912800  | 0.72807400  |
|  | M05-2X/maug-cc-pVTZ | C | -1.00067200 | -0.52022100 | 0.00310800  |



|               |                      |             |               |               |               |
|---------------|----------------------|-------------|---------------|---------------|---------------|
|               |                      | H           | 0.42591000    | -0.79807500   | -0.16568800   |
|               |                      | H           | -1.58232900   | -0.91734300   | -0.82769100   |
|               |                      | H           | -1.12072300   | -1.04635000   | 0.95676900    |
|               |                      | O           | -0.74233400   | 0.75924900    | 0.02745600    |
|               |                      | O           | 1.45058800    | -0.07739300   | -0.11781200   |
|               |                      | H           | 1.95201300    | -0.22085000   | 0.69114200    |
|               |                      | H           | 0.66312900    | 0.64909200    | 0.04966300    |
| TS3           | CCSD(T)-F12a/VDZ-F12 | N           | 1.5180406323  | -0.0687038889 | -0.0043179261 |
|               |                      | H           | 2.1007511400  | -0.1656606568 | -0.8256919043 |
|               |                      | H           | 2.0663383556  | -0.1500765223 | 0.8422202726  |
|               |                      | H           | 0.9589285393  | 0.8030650925  | -0.0183853262 |
|               |                      | C           | -1.0615664067 | -0.5348896878 | 0.0018879918  |
|               |                      | H           | 0.5080198190  | -0.7293829118 | -0.0097347558 |
|               |                      | H           | -1.4002518313 | -1.0281545103 | -0.9227180466 |
|               |                      | H           | -1.3800401362 | -1.0455990913 | 0.9243774503  |
|               |                      | O           | -0.9082671119 | 0.7555611768  | 0.0123612443  |
|               | QCISD/cc-pVTZ        | N           | -1.51833700   | -0.06420500   | 0.00000100    |
|               |                      | H           | -2.08486100   | -0.14028600   | 0.83350000    |
|               |                      | H           | -2.08487100   | -0.14030900   | -0.83348900   |
|               |                      | H           | -0.93113800   | 0.78980500    | -0.00001300   |
|               |                      | C           | 1.05242900    | -0.53834600   | 0.00000200    |
|               |                      | H           | -0.52352300   | -0.73421300   | 0.00000600    |
|               |                      | H           | 1.38345300    | -1.04403200   | 0.92035200    |
|               |                      | H           | 1.38344400    | -1.04404200   | -0.92034500   |
|               |                      | O           | 0.89641000    | 0.74907300    | -0.00000400   |
|               | W1U                  | N           | -1.52277600   | -0.07188000   | 0.00000400    |
|               |                      | H           | -2.09159700   | -0.12628600   | 0.83622300    |
| H             |                      | -2.09160100 | -0.12630100   | -0.83621000   |               |
| H             |                      | -0.87166200 | 0.75375000    | -0.00000400   |               |
| C             |                      | 1.07749300  | -0.52788300   | 0.00000200    |               |
| H             |                      | -0.56578400 | -0.78369800   | 0.00000800    |               |
| H             |                      | 1.41670600  | -1.02758200   | 0.92286000    |               |
| H             |                      | 1.41670200  | -1.02759800   | -0.92284900   |               |
| O             |                      | 0.87271400  | 0.75102200    | -0.00000900   |               |
| W1BD          | N                    | -1.52277600 | -0.07188000   | 0.00000400    |               |
|               | H                    | -2.09159700 | -0.12628600   | 0.83622300    |               |
|               | H                    | -2.09160100 | -0.12630100   | -0.83621000   |               |
|               | H                    | -0.87166200 | 0.75375000    | -0.00000400   |               |
|               | C                    | 1.07749300  | -0.52788300   | 0.00000200    |               |
|               | H                    | -0.56578400 | -0.78369800   | 0.00000800    |               |
|               | H                    | 1.41670600  | -1.02758200   | 0.92286000    |               |
|               | H                    | 1.41670200  | -1.02759800   | -0.92284900   |               |
|               | O                    | 0.87271400  | 0.75102200    | -0.00000900   |               |
| mPW2PLYP/MG3S | N                    | -1.52764700 | -0.06378600   | 0.00000400    |               |

|  |                    |   |             |             |             |
|--|--------------------|---|-------------|-------------|-------------|
|  |                    | H | -2.09242400 | -0.14887200 | 0.83301500  |
|  |                    | H | -2.09242800 | -0.14888700 | -0.83300300 |
|  |                    | H | -0.95595800 | 0.79894500  | -0.00000500 |
|  |                    | C | 1.06582000  | -0.53714900 | 0.00000200  |
|  |                    | H | -0.54979700 | -0.73624200 | 0.00000800  |
|  |                    | H | 1.39428500  | -1.03748500 | 0.92055700  |
|  |                    | H | 1.39428100  | -1.03750200 | -0.92054500 |
|  |                    | O | 0.90008200  | 0.74743000  | -0.00000900 |
|  | M06-2X/MG3S        | N | -1.52439900 | -0.07413600 | 0.00000400  |
|  |                    | H | -2.09028100 | -0.15116200 | 0.83593800  |
|  |                    | H | -2.09028500 | -0.15117800 | -0.83592600 |
|  |                    | H | -0.92233700 | 0.77830500  | -0.00000500 |
|  |                    | C | 1.09125000  | -0.52480800 | 0.00000200  |
|  |                    | H | -0.58386600 | -0.75795600 | 0.00000800  |
|  |                    | H | 1.43165000  | -1.01309400 | 0.92401400  |
|  |                    | H | 1.43164500  | -1.01311000 | -0.92400300 |
|  |                    | O | 0.86834600  | 0.74700000  | -0.00000900 |
|  | G4                 | N | -1.50363600 | -0.07982100 | 0.00000400  |
|  |                    | H | -2.07569100 | -0.11612400 | 0.83713700  |
|  |                    | H | -2.07569500 | -0.11613900 | -0.83712500 |
|  |                    | H | -0.78947400 | 0.71982900  | -0.00000400 |
|  |                    | C | 1.07299900  | -0.52108000 | 0.00000200  |
|  |                    | H | -0.55239800 | -0.80526100 | 0.00000800  |
|  |                    | H | 1.43267800  | -1.01492400 | 0.92370600  |
|  |                    | H | 1.43267200  | -1.01494000 | -0.92369500 |
|  |                    | O | 0.83942100  | 0.75409800  | -0.00000900 |
|  | CBS-QB3            | N | -1.51801300 | -0.07767500 | 0.00000400  |
|  |                    | H | -2.08767400 | -0.12429000 | 0.83884400  |
|  |                    | H | -2.08767800 | -0.12430600 | -0.83883200 |
|  |                    | H | -0.84482000 | 0.74073400  | -0.00000500 |
|  |                    | C | 1.08288600  | -0.52424400 | 0.00000200  |
|  |                    | H | -0.57205700 | -0.79944600 | 0.00000900  |
|  |                    | H | 1.43943700  | -1.01665200 | 0.92441500  |
|  |                    | H | 1.43943200  | -1.01666900 | -0.92440500 |
|  |                    | O | 0.85526700  | 0.75372700  | -0.00000800 |
|  | M05-2X/aug-cc-pVTZ | N | -1.52255700 | -0.06647400 | 0.00000400  |
|  |                    | H | -2.08469400 | -0.14706800 | 0.83440500  |
|  |                    | H | -2.08469900 | -0.14708400 | -0.83439200 |
|  |                    | H | -0.92600700 | 0.78424900  | -0.00000500 |
|  |                    | C | 1.07028100  | -0.53382000 | 0.00000200  |
|  |                    | H | -0.54552200 | -0.74218500 | 0.00000800  |
|  |                    | H | 1.39422600  | -1.02931700 | 0.92225200  |
|  |                    | H | 1.39422200  | -1.02933400 | -0.92224000 |
|  |                    | O | 0.88608600  | 0.74737200  | -0.00000900 |

|               |                      |               |               |               |               |
|---------------|----------------------|---------------|---------------|---------------|---------------|
|               | M05-2X/maug-cc-pVTZ  | N             | -1.52078800   | -0.06731900   | 0.00000400    |
|               |                      | H             | -2.08328300   | -0.14518200   | 0.83449400    |
|               |                      | H             | -2.08328700   | -0.14519800   | -0.83448200   |
|               |                      | H             | -0.91680400   | 0.77962600    | -0.00000500   |
|               |                      | C             | 1.07011000    | -0.53323600   | 0.00000200    |
|               |                      | H             | -0.54645200   | -0.74660200   | 0.00000800    |
|               |                      | H             | 1.39741700    | -1.02679900   | 0.92211000    |
|               |                      | H             | 1.39741300    | -1.02681500   | -0.92209800   |
|               |                      | O             | 0.88248200    | 0.74770300    | -0.00000900   |
| TS4           | CCSD(T)-F12a/VDZ-F12 | F             | 1.4310451570  | -0.1052987409 | -0.0067636560 |
|               |                      | H             | 0.4977591632  | 0.6412415145  | 0.1668805472  |
|               |                      | C             | -0.9369688768 | -0.5217701387 | -0.0169040758 |
|               |                      | H             | 0.2750653903  | -0.8314701895 | -0.3320883167 |
|               |                      | H             | -1.7990790451 | -0.8267327775 | -0.6006543263 |
|               |                      | H             | -0.7774887038 | -1.0699820753 | 0.9273492950  |
|               |                      | O             | -0.6544630848 | 0.7702004073  | -0.0015354673 |
|               |                      | QCISD/cc-pVTZ | F             | 1.41409300    | -0.09929200   |
|               | H                    |               | 0.44174300    | 0.66894400    | 0.17327000    |
|               | C                    |               | -0.92130900   | -0.54268700   | -0.01181700   |
|               | H                    |               | 0.28434800    | -0.80401100   | -0.33924700   |
|               | H                    |               | -1.79141600   | -0.84003800   | -0.58433000   |
|               | H                    |               | -0.78205900   | -1.06372800   | 0.94483700    |
|               | O                    |               | -0.66895000   | 0.77357300    | 0.01070800    |
|               | W1U                  |               | F             | 1.43669500    | -0.10061900   |
|               |                      | H             | 0.43237100    | 0.68771500    | 0.16770500    |
|               |                      | C             | -0.92978300   | -0.53789400   | -0.01048700   |
|               |                      | H             | 0.22729200    | -0.86750000   | -0.33104300   |
|               |                      | H             | -1.79063500   | -0.83564500   | -0.60140900   |
|               |                      | H             | -0.83453700   | -1.05369200   | 0.95968200    |
|               |                      | O             | -0.67325500   | 0.77525800    | 0.00842000    |
|               |                      | W1BD          | F             | 1.43669500    | -0.10061900   |
|               | H                    |               | 0.43237100    | 0.68771500    | 0.16770500    |
|               | C                    |               | -0.92978300   | -0.53789400   | -0.01048700   |
| H             | 0.22729200           |               | -0.86750000   | -0.33104300   |               |
| H             | -1.79063500          |               | -0.83564500   | -0.60140900   |               |
| H             | -0.83453700          |               | -1.05369200   | 0.95968200    |               |
| O             | -0.67325500          |               | 0.77525800    | 0.00842000    |               |
| mPW2PLYP/MG3S | F                    |               | 1.42769000    | -0.10274000   | -0.02335300   |
|               | H                    | 0.46448800    | 0.66038300    | 0.16238300    |               |
|               | C                    | -0.94039000   | -0.52531800   | -0.00919000   |               |
|               | H                    | 0.23382300    | -0.85858300   | -0.33775800   |               |
|               | H                    | -1.80466000   | -0.82231700   | -0.58799000   |               |
|               | H                    | -0.79845800   | -1.06295100   | 0.94022700    |               |
|               | O                    | -0.66275700   | 0.77000400    | 0.01105700    |               |

|                     |                      |             |               |               |               |
|---------------------|----------------------|-------------|---------------|---------------|---------------|
|                     | M06-2X/MG3S          | F           | 1.41662500    | -0.10210100   | -0.02420200   |
|                     |                      | H           | 0.48693700    | 0.65004900    | 0.16050500    |
|                     |                      | C           | -0.94078500   | -0.52218800   | -0.00930300   |
|                     |                      | H           | 0.28433900    | -0.82941100   | -0.32948100   |
|                     |                      | H           | -1.80140500   | -0.82736900   | -0.59433000   |
|                     |                      | H           | -0.78257500   | -1.06999500   | 0.93412000    |
|                     |                      | O           | -0.66152600   | 0.76609500    | 0.01285300    |
|                     | G4                   | F           | 1.42161000    | -0.10053400   | -0.02219700   |
|                     |                      | H           | 0.46483100    | 0.66388900    | 0.16347000    |
|                     |                      | C           | -0.92558600   | -0.53545000   | -0.01032800   |
|                     |                      | H           | 0.26945400    | -0.83379300   | -0.33276900   |
|                     |                      | H           | -1.78390900   | -0.84375700   | -0.60831200   |
|                     |                      | H           | -0.82552100   | -1.06705000   | 0.95436800    |
|                     |                      | O           | -0.67072900   | 0.77477700    | 0.01062300    |
|                     | CBS-QB3              | F           | 1.44200200    | -0.10017500   | -0.02054200   |
|                     |                      | H           | 0.40913100    | 0.70429300    | 0.17075500    |
|                     |                      | C           | -0.92420000   | -0.54383900   | -0.00936300   |
|                     |                      | H           | 0.19678500    | -0.88797100   | -0.35597300   |
|                     |                      | H           | -1.79634200   | -0.83379500   | -0.59159800   |
|                     |                      | H           | -0.84040500   | -1.04371600   | 0.97195100    |
|                     |                      | O           | -0.67524900   | 0.77822400    | 0.00574100    |
| M05-2X/aug-cc-pVTZ  | F                    | 1.42016200  | -0.10286100   | -0.02388800   |               |
|                     | H                    | 0.51802300  | 0.63599300    | 0.15494100    |               |
|                     | C                    | -0.94760800 | -0.52035100   | -0.00641600   |               |
|                     | H                    | 0.28735000  | -0.82272700   | -0.32540200   |               |
|                     | H                    | -1.78773400 | -0.83225800   | -0.61249800   |               |
|                     | H                    | -0.79754100 | -1.06832300   | 0.93340700    |               |
|                     | O                    | -0.66448800 | 0.76689600    | 0.01288000    |               |
| M05-2X/maug-cc-pVTZ | F                    | 1.41952600  | -0.10303500   | -0.02390000   |               |
|                     | H                    | 0.51807800  | 0.63548800    | 0.15480300    |               |
|                     | C                    | -0.94729800 | -0.52031700   | -0.00661400   |               |
|                     | H                    | 0.28792800  | -0.82227900   | -0.32416300   |               |
|                     | H                    | -1.78727700 | -0.83145700   | -0.61332000   |               |
|                     | H                    | -0.79942100 | -1.06833900   | 0.93357000    |               |
|                     | O                    | -0.66390700 | 0.76697500    | 0.01298600    |               |
| CH <sub>2</sub> OH  | CCSD(T)-F12a/VDZ-F12 | H           | -1.0913611686 | 0.7287946128  | -0.0539640877 |
|                     |                      | C           | 0.6822604414  | 0.0275089642  | -0.0707914385 |
|                     |                      | H           | 1.1078570924  | 0.9945801009  | 0.1579117032  |
|                     |                      | H           | 1.2346263555  | -0.8817930676 | 0.0992503517  |
|                     |                      | O           | -0.6717327208 | -0.1304226103 | 0.0236974713  |
|                     | QCISD/cc-pVTZ        | H           | -1.08070000   | 0.73659500    | -0.06192700   |
|                     |                      | C           | 0.68437600    | 0.02699600    | -0.06773700   |
|                     |                      | H           | 1.11525700    | 0.98754200    | 0.17798900    |
|                     |                      | H           | 1.23179400    | -0.88414100   | 0.10913000    |

|  |                     |   |             |             |             |
|--|---------------------|---|-------------|-------------|-------------|
|  |                     | O | -0.67157600 | -0.12524700 | 0.02265400  |
|  | W1U                 | H | -1.09662400 | 0.73329400  | -0.05319200 |
|  |                     | C | 0.68393400  | 0.02742400  | -0.06139300 |
|  |                     | H | 1.11926800  | 0.99244300  | 0.15939400  |
|  |                     | H | 1.23403900  | -0.88534200 | 0.10023400  |
|  |                     | O | -0.67003600 | -0.12561800 | 0.02024100  |
|  | W1BD                | H | -1.09662400 | 0.73329400  | -0.05319200 |
|  |                     | C | 0.68393400  | 0.02742400  | -0.06139300 |
|  |                     | H | 1.11926800  | 0.99244300  | 0.15939400  |
|  |                     | H | 1.23403900  | -0.88534200 | 0.10023400  |
|  |                     | O | -0.67003600 | -0.12561800 | 0.02024100  |
|  | mPW2PLYP/MG3S       | H | -1.09783600 | 0.72713900  | -0.05429300 |
|  |                     | C | 0.68269200  | 0.02750600  | -0.06035900 |
|  |                     | H | 1.11220200  | 0.99147400  | 0.15724500  |
|  |                     | H | 1.23195800  | -0.88170300 | 0.09782500  |
|  |                     | O | -0.66781000 | -0.12524400 | 0.02017200  |
|  | M06-2X/MG3S         | H | -1.10206700 | 0.72479000  | -0.05621900 |
|  |                     | C | 0.68085500  | 0.02801400  | -0.06364000 |
|  |                     | H | 1.11110700  | 0.99212600  | 0.16509400  |
|  |                     | H | 1.23359700  | -0.88093200 | 0.10337400  |
|  |                     | O | -0.66597100 | -0.12550900 | 0.02119800  |
|  | G4                  | H | -1.09050300 | 0.73481900  | -0.06871300 |
|  |                     | C | 0.68320300  | 0.02814400  | -0.07333000 |
|  |                     | H | 1.12065400  | 0.98665800  | 0.19336100  |
|  |                     | H | 1.22944300  | -0.88769800 | 0.11593600  |
|  |                     | O | -0.66985200 | -0.12533100 | 0.02492400  |
|  | CBS-QB3             | H | -1.09138300 | 0.73533000  | -0.06766000 |
|  |                     | C | 0.68460000  | 0.02759200  | -0.06638500 |
|  |                     | H | 1.12315700  | 0.98976100  | 0.17682300  |
|  |                     | H | 1.23074600  | -0.88936800 | 0.10217200  |
|  |                     | O | -0.67126500 | -0.12515900 | 0.02337200  |
|  | M05-2X/aug-cc-pVTZ  | H | -1.10167400 | 0.72494300  | -0.05664600 |
|  |                     | C | 0.68273800  | 0.02769300  | -0.05892600 |
|  |                     | H | 1.10941900  | 0.99275600  | 0.15459900  |
|  |                     | H | 1.23572800  | -0.87936800 | 0.09356500  |
|  |                     | O | -0.66748800 | -0.12556100 | 0.02025400  |
|  | M05-2X/maug-cc-pVTZ | H | -1.10129700 | 0.72521000  | -0.05726200 |
|  |                     | C | 0.68273300  | 0.02769100  | -0.05894200 |
|  |                     | H | 1.10915500  | 0.99298000  | 0.15488500  |
|  |                     | H | 1.23559600  | -0.87957200 | 0.09326600  |
|  |                     | O | -0.66748200 | -0.12559600 | 0.02034600  |
